# Supplementary material
Source: PubMed Central journal article supplement (PMC9217066)

# DAILY NEW CONFIRMED COVID-19 CASES IN ITALY, BRAZIL AND TAIWAN (FEBRUARY 1, 2020 – JANUARY 15, 2022)

## Italy

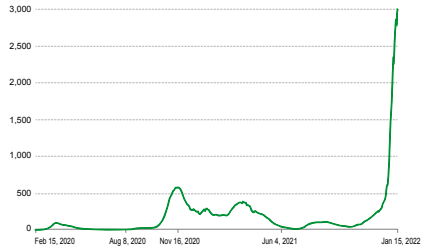

## Brazil

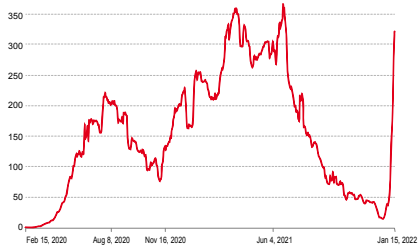

## Taiwan

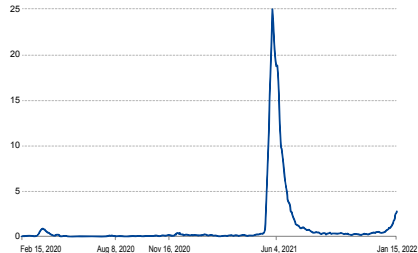

Supplement: mmc1.pdf [file mmc1.pdf]
